# Supplementary material for: Prevalence, Genetic Diversity, and Quantification of the RNA Genome of the Hepatitis E Virus in Slaughtered Pigs in Serbia
Source: MDPI journal article supplement (doi:10.3390/ani14040586), 2024-02-10
Supplement: s1 [file s1]

**Table S1.** Sequence information for pig HEV-3 sequences from three Serbian regions.

| Sequence ID-Collection Date | GenBank acc. Number | HEV-3 Genotype | Region   |
|-----------------------------|---------------------|----------------|----------|
| SRB-HEV-10SH-2020           | OR147107            | 3a             | Šumadija |
| SRB-HEV-110S-2020           | OR147109            | 3a             | Srem     |
| SRB-HEV-114K-2020           | OR147110            | 3a             | Kolubara |
| SRB-HEV-114S-2020           | OR147111            | 3a             | Srem     |
| SRB-HEV-115SH-2020          | OR147112            | 3a             | Šumadija |
| SRB-HEV-11SH-2020           | OR147114            | 3a             | Šumadija |
| SRB-HEV-121SH-2020          | OR147115            | 3a             | Šumadija |
| SRB-HEV-124K-2020           | OR147116            | 3a             | Kolubara |
| SRB-HEV-128S-2020           | OR147117            | 3a             | Srem     |
| SRB-HEV-12K-2020            | OR147118            | 3a             | Kolubara |
| SRB-HEV-131K-2020           | OR147119            | 3a             | Kolubara |
| SRB-HEV-135SH-2020          | OR147120            | 3a             | Šumadija |
| SRB-HEV-143SH-2020          | OR147121            | 3a             | Šumadija |
| SRB-HEV-149S-2020           | OR147122            | 3a             | Srem     |
| SRB-HEV-150S-2020           | OR147123            | 3a             | Srem     |
| SRB-HEV-153SH-2020          | OR147124            | 3a             | Šumadija |
| SRB-HEV-15R-2020            | OR147126            | 3a             | Šumadija |
| SRB-HEV-160SH-2020          | OR147127            | 3a             | Šumadija |
| SRB-HEV-162S-2020           | OR147128            | 3a             | Srem     |
| SRB-HEV-169K-2020           | OR147130            | 3a             | Kolubara |
| SRB-HEV-173K-2020           | OR147131            | 3a             | Kolubara |
| SRB-HEV-173S-2020           | OR147132            | 3a             | Srem     |
| SRB-HEV-177S-2020           | OR147133            | 3a             | Srem     |
| SRB-HEV-17S-2020            | OR147134            | 3a             | Srem     |
| SRB-HEV-185S-2020           | OR147136            | 3a             | Srem     |
| SRB-HEV-191S-2020           | OR147138            | 3a             | Srem     |
| SRB-HEV-24SH-2020           | OR147139            | 3a             | Šumadija |
| SRB-HEV-25S-2020            | OR147140            | 3a             | Srem     |
| SRB-HEV-25SH-2020           | OR147141            | 3              | Šumadija |
| SRB-HEV-27S-2020            | OR147142            | 3a             | Srem     |
| SRB-HEV-37SH-2020           | OR147143            | 3a             | Šumadija |
| SRB-HEV-40K-2020            | OR147144            | 3a             | Kolubara |
| SRB-HEV-43S-2020            | OR147145            | 3a             | Srem     |
| SRB-HEV-45S-2020            | OR147146            | 3a             | Šumadija |
| SRB-HEV-47R-2020            | OR147147            | 3c             | Šumadija |
| SRB-HEV-48K-2020            | OR147148            | 3a             | Kolubara |
| SRB-HEV-51K-2020            | OR147149            | 3a             | Kolubara |
| SRB-HEV-56S-2020            | OR147150            | 3a             | Srem     |
| SRB-HEV-67K-2020            | OR147151            | 3a             | Kolubara |
| SRB-HEV-73K-2020            | OR147152            | 3a             | Kolubara |
| SRB-HEV-76K-2020            | OR147153            | 3a             | Kolubara |
| SRB-HEV-82K-2020            | OR147154            | 3a             | Kolubara |
| SRB-HEV-86S-2020            | OR147155            | 3a             | Srem     |
| SRB-HEV-90S-2020            | OR147156            | 3a             | Srem     |
| SRB-HEV-95K-2020            | OR147157            | 3a             | Kolubara |
